# Supplementary material for: LncRNA MSC-AS1 Is a Diagnostic Biomarker and Predicts Poor Prognosis in Patients With Gastric Cancer by Integrated Bioinformatics Analysis
Source: Front Med (Lausanne). 2021 Dec 2;8:795427. doi: 10.3389/fmed.2021.795427 (PMC8674534; doi:10.3389/fmed.2021.795427)
Supplement: Supplementary file 1 [file Table_1.XLSX]

## Sheet: Sheet1
gene_id	baseMean	log2FoldChange	lfcSE	stat	pvalue	padj	gene_name	gene_biotype	cor_pvalue	correlation
ENSG00000133392	113601	3.05282	0.223588	13.6538	1.91574e-42	5.09253e-40	MYH11	protein_coding	0	0.546288
ENSG00000175084	59798.1	2.35703	0.270641	8.70909	3.06328e-18	1.08345e-16	DES	protein_coding	0	0.409039
ENSG00000163017	50892.5	2.7799	0.232044	11.98	4.52071e-33	5.6657e-31	ACTG2	protein_coding	0	0.486324
ENSG00000065534	24474.1	2.07826	0.169162	12.2856	1.08217e-34	1.53102e-32	MYLK	protein_coding	0	0.725797
ENSG00000172403	21982.3	2.54268	0.215562	11.7956	4.11319e-32	4.75389e-30	SYNPO2	protein_coding	0	0.605591
ENSG00000130176	17123.1	2.934	0.218116	13.4516	3.01426e-41	7.28426e-39	CNN1	protein_coding	0	0.588733
ENSG00000128591	16166.8	2.39725	0.207902	11.5307	9.24305e-31	9.58601e-29	FLNC	protein_coding	0	0.544203
ENSG00000111341	15199.1	2.2039	0.141002	15.6302	4.53184e-55	3.41627e-52	MGP	protein_coding	0	0.737354
ENSG00000182253	10681.4	2.97654	0.21515	13.8347	1.57367e-43	4.46525e-41	SYNM	protein_coding	0	0.495843
ENSG00000145423	10593.7	2.45126	0.194534	12.6007	2.09359e-36	3.43712e-34	SFRP2	protein_coding	0	0.716014
ENSG00000091986	10363.4	2.36533	0.136426	17.3378	2.43753e-67	5.12968e-64	CCDC80	protein_coding	0	0.818323
ENSG00000004776	8914.54	2.9126	0.21273	13.6915	1.14108e-42	3.06555e-40	HSPB6	protein_coding	0	0.602545
ENSG00000022267	7652.92	2.17374	0.1679	12.9466	2.45528e-38	4.71517e-36	FHL1	protein_coding	0	0.626875
ENSG00000106483	6214.99	2.24877	0.175772	12.7937	1.77814e-37	3.08621e-35	SFRP4	protein_coding	0	0.75134
ENSG00000163431	6086.86	2.19561	0.193149	11.3674	6.07585e-30	5.86755e-28	LMOD1	protein_coding	0	0.634825
ENSG00000106772	5875.48	2.24353	0.195404	11.4815	1.63444e-30	1.66433e-28	PRUNE2	protein_coding	0	0.523615
ENSG00000187955	5515.63	2.45966	0.125329	19.6257	9.32977e-86	1.57073e-81	COL14A1	protein_coding	0	0.794526
ENSG00000144810	5126.36	2.15196	0.115839	18.5772	4.91385e-77	2.7576e-73	COL8A1	protein_coding	0	0.8519
ENSG00000164694	5086.74	2.18692	0.1517	14.4161	4.10148e-47	1.59349e-44	FNDC1	protein_coding	0	0.759242
ENSG00000188783	4517.22	2.07713	0.174528	11.9014	1.16325e-32	1.39886e-30	PRELP	protein_coding	0	0.729581
ENSG00000113296	4064.37	3.30946	0.202264	16.3621	3.56745e-60	4.00403e-57	THBS4	protein_coding	0	0.707166
ENSG00000112936	3991.01	2.88483	0.214704	13.4363	3.70309e-41	8.86407e-39	C7	protein_coding	0	0.579311
ENSG00000174348	3936.61	2.03338	0.123163	16.5096	3.12702e-61	3.94444e-58	PODN	protein_coding	0	0.777393
ENSG00000156113	3579.01	2.36499	0.185499	12.7493	3.14514e-37	5.3306e-35	KCNMA1	protein_coding	0	0.65997
ENSG00000124212	2899.85	2.36469	0.160678	14.7169	5.018e-49	2.30404e-46	PTGIS	protein_coding	0	0.715036
ENSG00000106809	2612.1	2.96766	0.205817	14.4189	3.93573e-47	1.55298e-44	OGN	protein_coding	0	0.691174
ENSG00000171401	2474.77	-4.65694	0.359738	-12.9454	2.49572e-38	4.77468e-36	KRT13	protein_coding	0.000209496	-0.190326
ENSG00000173641	2308.19	2.37978	0.208609	11.4078	3.8215e-30	3.74781e-28	HSPB7	protein_coding	0	0.587507
ENSG00000138061	2302.4	2.37637	0.152198	15.6137	5.87277e-55	4.362e-52	CYP1B1	protein_coding	0	0.732319
ENSG00000205420	2233.3	-2.73157	0.325937	-8.38066	5.26314e-17	1.63585e-15	KRT6A	protein_coding	0.228437	-0.0623424
ENSG00000170477	1748.23	-4.70998	0.374283	-12.584	2.58524e-36	4.18502e-34	KRT4	protein_coding	0.0168493	-0.123358
ENSG00000185269	1724.23	-2.95149	0.261161	-11.3014	1.29105e-29	1.22111e-27	NOTUM	protein_coding	0.0561709	-0.0987161
ENSG00000196616	1603.34	2.45893	0.212732	11.5588	6.66129e-31	6.98012e-29	ADH1B	protein_coding	1.75393e-23	0.484627
ENSG00000165124	1591.81	2.22329	0.117907	18.8563	2.60701e-79	2.63344e-75	SVEP1	protein_coding	0	0.774884
ENSG00000167676	1588.1	2.55115	0.217928	11.7064	1.18212e-31	1.318e-29	PLIN4	protein_coding	0	0.456107
ENSG00000144857	1555.53	2.18021	0.141986	15.3551	3.27241e-53	2.20373e-50	BOC	protein_coding	0	0.761909
ENSG00000198523	1459.06	2.08408	0.192383	10.833	2.40263e-27	1.90502e-25	PLN	protein_coding	0	0.659626
ENSG00000069431	1360.66	2.02077	0.129717	15.5783	1.02292e-54	7.38065e-52	ABCC9	protein_coding	0	0.792046
ENSG00000104332	1330.07	2.34257	0.207287	11.3011	1.29596e-29	1.22346e-27	SFRP1	protein_coding	0	0.662086
ENSG00000163209	1303.1	-2.8729	0.383333	-7.49454	6.65333e-14	1.4161e-12	SPRR3	protein_coding	0.0607803	-0.0969247
ENSG00000186081	1296.29	-4.21904	0.304809	-13.8416	1.43069e-43	4.10567e-41	KRT5	protein_coding	0.00110866	0.167782
ENSG00000087258	1286.8	2.04936	0.17265	11.8701	1.6934e-32	2.00302e-30	GNAO1	protein_coding	0	0.631132
ENSG00000141052	1229.7	2.17914	0.177939	12.2466	1.75194e-34	2.45112e-32	MYOCD	protein_coding	0	0.537526
ENSG00000075073	1178.61	2.28524	0.229781	9.94531	2.64355e-23	1.46401e-21	TACR2	protein_coding	4.22052e-13	0.364657
ENSG00000138615	1083.61	2.55352	0.194286	13.1431	1.8647e-39	3.95717e-37	CILP	protein_coding	0	0.648904
ENSG00000185070	1082.12	2.25249	0.11913	18.9079	9.81287e-80	1.23905e-75	FLRT2	protein_coding	0	0.810805
ENSG00000180447	1060.27	2.057	0.146322	14.0581	6.8723e-45	2.1559e-42	GAS1	protein_coding	0	0.771799
ENSG00000164107	1051.18	2.05088	0.244809	8.37745	5.40883e-17	1.67803e-15	HAND2	protein_coding	1.48252e-43	0.63401
ENSG00000204983	926.817	-2.25445	0.274064	-8.22599	1.93581e-16	5.62878e-15	PRSS1	protein_coding	0.0189986	-0.121082
ENSG00000145147	919.168	2.42511	0.13876	17.4769	2.14757e-68	5.7088e-65	SLIT2	protein_coding	0	0.805137
ENSG00000143556	914.818	-4.45361	0.367232	-12.1275	7.55173e-34	1.01711e-31	S100A7	protein_coding	5.2639e-05	-0.207231
ENSG00000021645	896.933	2.10622	0.179093	11.7605	6.23688e-32	7.12683e-30	NRXN3	protein_coding	0	0.586008
ENSG00000172724	881.022	2.00667	0.208996	9.60149	7.87933e-22	3.80824e-20	CCL19	protein_coding	0	0.519883
ENSG00000101938	867.776	2.77136	0.204852	13.5286	1.06011e-41	2.65065e-39	CHRDL1	protein_coding	7.02272e-47	0.652633
ENSG00000198542	764.674	2.29807	0.152186	15.1004	1.60912e-51	9.56141e-49	ITGBL1	protein_coding	0	0.740305
ENSG00000064300	752.55	2.32289	0.206058	11.273	1.78447e-29	1.66596e-27	NGFR	protein_coding	0	0.557973
ENSG00000196754	640.575	-2.04593	0.202156	-10.1205	4.47917e-24	2.65839e-22	S100A2	protein_coding	0.0189463	-0.121184
ENSG00000119147	626.589	2.266	0.246068	9.20883	3.29688e-20	1.39812e-18	C2orf40	protein_coding	1.33184e-28	0.53046
ENSG00000018625	586.723	2.96198	0.211234	14.0223	1.13942e-44	3.5306e-42	ATP1A2	protein_coding	9.08017e-37	0.591553
ENSG00000186847	582.391	-3.53989	0.31584	-11.2079	3.73123e-29	3.39556e-27	KRT14	protein_coding	0.472344	-0.0372234
ENSG00000241644	578.765	2.03252	0.124896	16.2737	1.5183e-59	1.5976e-56	INMT	protein_coding	0	0.743088
ENSG00000138944	572.805	2.02096	0.175777	11.4973	1.36164e-30	1.39498e-28	KIAA1644	protein_coding	0	0.610047
ENSG00000122367	568.874	2.70045	0.187949	14.368	8.22091e-47	3.07566e-44	LDB3	protein_coding	0	0.532477
ENSG00000116194	542.651	2.35628	0.194888	12.0904	1.18708e-33	1.56952e-31	ANGPTL1	protein_coding	0	0.682793
ENSG00000140519	517.622	-3.54213	0.269395	-13.1484	1.73728e-39	3.7023e-37	RHCG	protein_coding	0.117474	-0.0809777
ENSG00000237125	514.627	3.17037	0.224714	14.1085	3.36702e-45	1.09715e-42	HAND2-AS1	antisense	2.57787e-48	0.660286
ENSG00000147381	495.656	-2.19171	0.498302	-4.39837	1.09067e-05	6.11802e-05	MAGEA4	protein_coding	0.234399	-0.0615522
ENSG00000164106	492.934	2.12143	0.222142	9.5499	1.29824e-21	6.13955e-20	SCRG1	protein_coding	0	0.578818
ENSG00000135333	487.981	2.18044	0.208691	10.4482	1.4938e-25	1.00196e-23	EPHA7	protein_coding	3.17686e-25	0.501012
ENSG00000181072	460.489	2.36849	0.271558	8.72183	2.73748e-18	9.74363e-17	CHRM2	protein_coding	7.56103e-22	0.468407
ENSG00000127083	431.819	2.81371	0.163704	17.1877	3.2822e-66	6.37592e-63	OMD	protein_coding	0	0.773802
ENSG00000164530	429.284	2.47234	0.214669	11.517	1.08369e-30	1.1193e-28	PI16	protein_coding	1.5807e-26	0.512716
ENSG00000138356	427.972	2.13912	0.159507	13.4108	5.22469e-41	1.2331e-38	AOX1	protein_coding	0	0.695332
ENSG00000117425	414.724	2.19074	0.131747	16.6284	4.34066e-62	5.92524e-59	PTCH2	protein_coding	0	0.655209
ENSG00000118729	407.311	2.95202	0.209379	14.0989	3.8549e-45	1.24012e-42	CASQ2	protein_coding	0	0.597529
ENSG00000170323	400.769	3.10434	0.207157	14.9854	9.14067e-51	4.91136e-48	FABP4	protein_coding	0	0.556606
ENSG00000115593	371.769	3.32025	0.30837	10.7671	4.92302e-27	3.76168e-25	SMYD1	protein_coding	3.49015e-09	0.299013
ENSG00000171564	339.794	-2.43289	0.326945	-7.4413	9.97028e-14	2.06127e-12	FGB	protein_coding	0.0455598	-0.10332
ENSG00000080644	332.05	2.17963	0.20967	10.3955	2.59835e-25	1.70879e-23	CHRNA3	protein_coding	0	0.441604
ENSG00000171560	332.001	-2.57344	0.309137	-8.3246	8.46122e-17	2.56206e-15	FGA	protein_coding	0.0351049	-0.108852
ENSG00000241794	325.255	-2.92638	0.421502	-6.94273	3.84581e-12	6.40211e-11	SPRR2A	protein_coding	0.0220966	-0.118168
ENSG00000166535	304.321	-2.34262	0.271394	-8.6318	6.03913e-18	2.08488e-16	A2ML1	protein_coding	0.0114479	0.13046
ENSG00000017427	291.868	2.36837	0.164214	14.4225	3.73627e-47	1.48589e-44	IGF1	protein_coding	0	0.679472
ENSG00000163145	288.625	2.08438	0.156696	13.3021	2.25143e-40	5.07646e-38	C1QTNF7	protein_coding	0	0.614537
ENSG00000178343	283.491	2.15212	0.197715	10.885	1.35936e-27	1.09676e-25	SHISA3	protein_coding	4.12174e-36	0.587084
ENSG00000233117	277.608	2.32003	0.180048	12.8856	5.42526e-38	1.00371e-35	LINC00702	lincRNA	0	0.675393
ENSG00000136546	276.603	2.11841	0.213651	9.9153	3.57189e-23	1.95244e-21	SCN7A	protein_coding	2.02251e-37	0.595922
ENSG00000143536	255.39	-6.3242	0.576771	-10.9648	5.63987e-28	4.68508e-26	CRNN	protein_coding	0.0147473	-0.125844
ENSG00000154258	251.945	2.16374	0.13316	16.2492	2.26456e-59	2.3342e-56	ABCA9	protein_coding	0	0.737274
ENSG00000158516	238.412	-2.71249	0.300284	-9.03307	1.66917e-19	6.67496e-18	CPA2	protein_coding	0.168587	-0.071243
ENSG00000146469	236.045	2.85254	0.250187	11.4016	4.10465e-30	4.00993e-28	VIP	protein_coding	8.32569e-27	0.515159
ENSG00000123572	230.098	2.36982	0.190562	12.4359	1.66753e-35	2.52162e-33	NRK	protein_coding	1.50325e-58	0.709041
ENSG00000122420	228.5	2.08397	0.123457	16.8801	6.30185e-64	9.64507e-61	PTGFR	protein_coding	0	0.77237
ENSG00000165966	219.566	2.29895	0.214715	10.707	9.43593e-27	7.08144e-25	PDZRN4	protein_coding	9.01844e-49	0.662673
ENSG00000165323	212.151	2.36996	0.187386	12.6475	1.15452e-36	1.9056e-34	FAT3	protein_coding	0	0.642162
ENSG00000016602	212.035	-3.21219	0.288808	-11.1222	9.7789e-29	8.5747e-27	CLCA4	protein_coding	0.0794812	-0.090677
ENSG00000162706	210.704	2.24912	0.199761	11.259	2.0905e-29	1.9409e-27	CADM3	protein_coding	5.352e-41	0.61876
ENSG00000170465	209.997	-4.916	0.367451	-13.3786	8.06074e-41	1.86754e-38	KRT6C	protein_coding	0.112307	-0.0821349
ENSG00000106511	209.249	2.52076	0.161129	15.6444	3.62821e-55	2.77651e-52	MEOX2	protein_coding	3.69268e-68	0.74716
ENSG00000204544	208.661	-5.02087	0.352665	-14.2369	5.4048e-46	1.88262e-43	MUC21	protein_coding	0.000671559	-0.174852
ENSG00000167483	206.531	2.00722	0.201115	9.98049	1.85558e-23	1.04249e-21	FAM129C	protein_coding	0	0.419421
ENSG00000163534	203.103	2.66266	0.23866	11.1567	6.64318e-29	5.89678e-27	FCRL1	protein_coding	2.03292e-16	0.407299
ENSG00000057149	200.919	-2.40676	0.334543	-7.19417	6.28426e-13	1.16306e-11	SERPINB3	protein_coding	0.0654578	-0.0952282
ENSG00000034971	199.457	2.46286	0.292656	8.41554	3.91101e-17	1.23613e-15	MYOC	protein_coding	6.28966e-23	0.47922
ENSG00000141579	192.836	-2.29051	0.218	-10.507	8.02387e-26	5.47651e-24	ZNF750	protein_coding	0.0598342	0.0972898
ENSG00000116690	189.914	2.14662	0.165473	12.9726	1.74969e-38	3.49295e-36	PRG4	protein_coding	0	0.6186
ENSG00000175426	188.573	2.1085	0.177906	11.8518	2.10585e-32	2.46776e-30	PCSK1	protein_coding	0	0.502148
ENSG00000151655	185.793	-2.09694	0.230396	-9.10144	8.9139e-20	3.64546e-18	ITIH2	protein_coding	0.0880879	0.0881981
ENSG00000203785	170.971	-4.60373	0.532153	-8.65113	5.09934e-18	1.77256e-16	SPRR2E	protein_coding	0.154105	-0.0737419
ENSG00000164122	160.013	2.53499	0.308389	8.22011	2.03309e-16	5.89468e-15	ASB5	protein_coding	2.07505e-15	0.394435
ENSG00000125780	152.487	-2.2577	0.222393	-10.1519	3.25108e-24	1.96414e-22	TGM3	protein_coding	0.13219	-0.0778866
ENSG00000106018	151.782	2.17348	0.169586	12.8164	1.32802e-37	2.32896e-35	VIPR2	protein_coding	1.99075e-38	0.602539
ENSG00000117148	151.262	-2.33001	0.291489	-7.99347	1.31193e-15	3.45834e-14	ACTL8	protein_coding	0.000437644	-0.180686
ENSG00000077522	150.662	2.46624	0.225147	10.9539	6.36513e-28	5.27022e-26	ACTN2	protein_coding	0	0.45501
ENSG00000104435	148.811	2.10946	0.201455	10.4711	1.17214e-25	7.90406e-24	STMN2	protein_coding	1.18638e-34	0.576902
ENSG00000161055	146.948	-2.36149	0.255096	-9.25727	2.09722e-20	9.06109e-19	SCGB3A1	protein_coding	0.923153	-0.00499796
ENSG00000145536	143.635	2.22527	0.151078	14.7292	4.1841e-49	1.93877e-46	ADAMTS16	protein_coding	0	0.575074
ENSG00000102452	142.233	2.00615	0.135324	14.8248	1.01294e-49	5.01575e-47	NALCN	protein_coding	0	0.740027
ENSG00000130226	140.394	2.22666	0.233654	9.52974	1.57685e-21	7.37424e-20	DPP6	protein_coding	3.59834e-13	0.363695
ENSG00000065325	136.261	2.06734	0.161933	12.7667	2.5167e-37	4.29429e-35	GLP2R	protein_coding	1.7807e-33	0.568426
ENSG00000138650	130.482	2.41527	0.230366	10.4845	1.01779e-25	6.90931e-24	PCDH10	protein_coding	7.00656e-33	0.564044
ENSG00000171557	127.742	-2.98506	0.369703	-8.07422	6.79112e-16	1.85505e-14	FGG	protein_coding	0.441326	-0.0398776
ENSG00000102468	122.386	2.11467	0.134532	15.7187	1.12657e-55	9.0317e-53	HTR2A	protein_coding	1.00353e-87	0.808025
ENSG00000169550	116.723	-2.00391	0.381913	-5.24702	1.54581e-07	1.23614e-06	MUC15	protein_coding	0.0927739	-0.0869294
ENSG00000149970	113.64	2.44411	0.187053	13.0664	5.12176e-39	1.06018e-36	CNKSR2	protein_coding	1.94757e-37	0.596031
ENSG00000164326	111.276	3.15114	0.329678	9.55824	1.19777e-21	5.68038e-20	CARTPT	protein_coding	3.1416e-13	0.364548
ENSG00000137975	108.477	-2.4141	0.288679	-8.36259	6.13548e-17	1.89532e-15	CLCA2	protein_coding	0.00332082	0.151265
ENSG00000166819	107.757	2.2074	0.189293	11.6613	2.00965e-31	2.20176e-29	PLIN1	protein_coding	2.61368e-06	0.239906
ENSG00000254851	102.343	2.16815	0.193112	11.2274	2.99129e-29	2.74693e-27	RP11-109L13.1	pseudogene	1.57459e-12	0.354257
ENSG00000144229	102.106	2.15342	0.180561	11.9263	8.63239e-33	1.04807e-30	THSD7B	protein_coding	3.23447e-42	0.626132
ENSG00000129596	99.8659	2.39374	0.145003	16.5082	3.20197e-61	3.94444e-58	CDO1	protein_coding	0	0.756267
ENSG00000163216	98.6918	-2.73562	0.36272	-7.54198	4.62904e-14	1.00602e-12	SPRR2D	protein_coding	0.0367431	-0.1079
ENSG00000253250	98.1725	2.07069	0.172915	11.9752	4.79018e-33	5.97377e-31	C8orf88	protein_coding	0	0.645899
ENSG00000181195	96.4065	2.46661	0.249029	9.90489	3.96411e-23	2.15054e-21	PENK	protein_coding	9.54365e-24	0.487171
ENSG00000163395	96.3871	2.54597	0.227013	11.2151	3.4399e-29	3.14175e-27	IGFN1	protein_coding	3.61189e-16	0.404168
ENSG00000124391	96.0507	-2.02041	0.219493	-9.20488	3.42056e-20	1.44692e-18	IL17C	protein_coding	3.71064e-06	-0.236331
ENSG00000141433	93.8563	2.17641	0.193409	11.2529	2.24031e-29	2.07617e-27	ADCYAP1	protein_coding	1.62496e-30	0.545949
ENSG00000077279	90.1653	2.82835	0.224855	12.5785	2.77122e-36	4.45752e-34	DCX	protein_coding	7.46376e-15	0.387099
ENSG00000102271	80.6694	2.03986	0.135673	15.0351	4.32191e-51	2.39875e-48	KLHL4	protein_coding	0	0.732952
ENSG00000181092	77.4855	4.63611	0.332984	13.9229	4.59795e-44	1.37414e-41	ADIPOQ	protein_coding	1.10292e-13	0.371039
ENSG00000169218	74.8676	2.24594	0.176203	12.7463	3.26821e-37	5.52064e-35	RSPO1	protein_coding	1.36959e-45	0.645559
ENSG00000189001	70.8568	-2.9046	0.298115	-9.74323	1.97193e-22	1.00704e-20	SBSN	protein_coding	0.0331248	0.110055
ENSG00000082293	65.08	2.12941	0.192323	11.072	1.71514e-28	1.47324e-26	COL19A1	protein_coding	6.94189e-26	0.507001
ENSG00000223561	64.5504	2.47244	0.200353	12.3404	5.48563e-35	7.93876e-33	AC003090.1	lincRNA	5.14524e-31	0.549863
ENSG00000111262	63.0272	3.07446	0.279139	11.0141	3.26757e-28	2.76905e-26	KCNA1	protein_coding	4.49248e-25	0.499631
ENSG00000181433	62.561	-2.05227	0.373579	-5.49355	3.93924e-08	3.48013e-07	SAGE1	protein_coding	0.699319	-0.0200101
ENSG00000006128	62.4643	2.62623	0.306129	8.57884	9.58307e-18	3.2397e-16	TAC1	protein_coding	5.64704e-13	0.360846
ENSG00000163377	59.9526	2.35694	0.302208	7.79907	6.23644e-15	1.5158e-13	FAM19A4	protein_coding	4.05325e-11	0.332305
ENSG00000170423	59.4884	-2.96859	0.305516	-9.71663	2.56112e-22	1.29355e-20	KRT78	protein_coding	0.00525531	-0.143854
ENSG00000143954	59.4406	-2.78389	0.35922	-7.7498	9.20386e-15	2.18547e-13	REG3G	protein_coding	0.817118	-0.0119815
ENSG00000046774	59.4161	-2.17902	0.530442	-4.10794	3.99205e-05	0.000199275	MAGEC2	protein_coding	0.103375	-0.0842377
ENSG00000174403	57.5975	2.59037	0.209872	12.3426	5.34075e-35	7.7513e-33	C20orf166-AS1	antisense	2.54427e-24	0.492624
ENSG00000135298	56.8219	2.01003	0.173423	11.5903	4.61342e-31	4.94713e-29	BAI3	protein_coding	4.06692e-49	0.664467
ENSG00000266524	55.9557	2.35888	0.201948	11.6806	1.60074e-31	1.7769e-29	GDF10	protein_coding	1.70625e-37	0.596413
ENSG00000087128	53.1955	-2.89944	0.326487	-8.88073	6.64207e-19	2.51855e-17	TMPRSS11E	protein_coding	0.172716	-0.0705602
ENSG00000185873	52.9425	-4.40471	0.450851	-9.76975	1.51821e-22	7.84853e-21	TMPRSS11B	protein_coding	0.104374	-0.0839957
ENSG00000163207	52.9189	-3.05831	0.448627	-6.81704	9.29369e-12	1.45594e-10	IVL	protein_coding	0.685748	-0.0209628
ENSG00000163792	52.3566	2.6352	0.203628	12.9413	2.63292e-38	5.01814e-36	TCF23	protein_coding	2.15427e-21	0.463736
ENSG00000157851	51.0285	2.30883	0.221462	10.4254	1.8992e-25	1.26214e-23	DPYSL5	protein_coding	4.24027e-18	0.42757
ENSG00000156466	49.8371	2.14049	0.17925	11.9414	7.20243e-33	8.85092e-31	GDF6	protein_coding	4.49047e-64	0.731743
ENSG00000169509	47.682	-2.77578	0.395977	-7.00994	2.38419e-12	4.09168e-11	CRCT1	protein_coding	0.0174037	-0.122748
ENSG00000185681	44.4489	2.67637	0.269776	9.92074	3.38235e-23	1.85284e-21	MORN5	protein_coding	1.37036e-10	0.323603
ENSG00000178363	44.1039	-3.08475	0.31486	-9.79719	1.15763e-22	6.06153e-21	CALML3	protein_coding	0.066955	-0.0947063
ENSG00000263065	43.2553	2.08489	0.213512	9.76476	1.59495e-22	8.22002e-21	AF001548.6	antisense	2.20292e-24	0.493212
ENSG00000224958	42.6869	2.26753	0.256795	8.83012	1.04565e-18	3.84933e-17	PGM5-AS1	antisense	5.8959e-23	0.479496
ENSG00000091704	42.311	-2.37673	0.317398	-7.48817	6.98405e-14	1.48212e-12	CPA1	protein_coding	4.76643e-07	0.256524
ENSG00000187054	39.8072	-3.10676	0.370087	-8.39468	4.67173e-17	1.46102e-15	TMPRSS11A	protein_coding	0.166871	-0.0715304
ENSG00000166407	39.0661	2.87329	0.271048	10.6007	2.95865e-26	2.08124e-24	LMO1	protein_coding	1.99979e-11	0.337228
ENSG00000197641	37.7619	-2.86317	0.398058	-7.19286	6.34469e-13	1.17381e-11	SERPINB13	protein_coding	0.223483	-0.0630099
ENSG00000115263	35.8874	3.13584	0.393082	7.97758	1.4923e-15	3.90123e-14	GCG	protein_coding	0.126525	0.0790434
ENSG00000260802	33.8648	2.08531	0.193214	10.7928	3.72434e-27	2.88063e-25	LINC00890	lincRNA	3.25331e-32	0.559054
ENSG00000170890	33.8285	-2.36081	0.238714	-9.88971	4.6136e-23	2.48686e-21	PLA2G1B	protein_coding	0.663237	0.0225589
ENSG00000153802	33.1761	-2.44339	0.286631	-8.52453	1.53437e-17	5.05523e-16	TMPRSS11D	protein_coding	0.0929018	0.0868955
ENSG00000184811	32.6833	3.43107	0.259679	13.2127	7.41007e-40	1.61319e-37	TUSC5	protein_coding	4.28404e-15	0.390303
ENSG00000188778	31.6588	2.06401	0.224778	9.18243	4.21485e-20	1.77252e-18	ADRB3	protein_coding	8.80253e-23	0.47778
ENSG00000184330	29.6773	-2.82225	0.390046	-7.23568	4.63212e-13	8.71664e-12	S100A7A	protein_coding	0.0295437	-0.112395
ENSG00000155511	29.0771	2.1419	0.17593	12.1747	4.23826e-34	5.76987e-32	GRIA1	protein_coding	3.06912e-35	0.581042
ENSG00000139330	27.638	2.62889	0.195131	13.4724	2.27284e-41	5.59972e-39	KERA	protein_coding	1.22644e-52	0.682054
ENSG00000132872	26.9217	2.00984	0.259124	7.75628	8.74576e-15	2.08359e-13	SYT4	protein_coding	1.84604e-15	0.395096
ENSG00000178372	26.397	-2.27855	0.384479	-5.92633	3.09787e-09	3.26443e-08	CALML5	protein_coding	0.0217263	-0.118497
ENSG00000115665	26.2606	2.39487	0.242457	9.87746	5.21353e-23	2.79236e-21	SLC5A7	protein_coding	1.06305e-09	0.308308
ENSG00000231172	24.496	-2.17717	0.301137	-7.22985	4.83527e-13	9.06515e-12	AC007099.1	antisense	0.149403	-0.0745915
ENSG00000230937	24.1754	-2.32599	0.399473	-5.82263	5.79273e-09	5.84096e-08	MIR205HG	lincRNA	0.688831	-0.0207458
ENSG00000244094	22.4976	-3.27354	0.381155	-8.58847	8.81372e-18	2.99364e-16	SPRR2F	protein_coding	0.236252	-0.0613097
ENSG00000246430	21.9385	2.17365	0.141286	15.3847	2.07314e-53	1.41498e-50	LINC00968	lincRNA	2.26881e-74	0.768633
ENSG00000186297	21.7264	2.17157	0.279605	7.76656	8.06485e-15	1.92865e-13	GABRA5	protein_coding	1.18837e-09	0.30745
ENSG00000187714	21.4116	2.48492	0.301804	8.23357	1.81712e-16	5.31734e-15	SLC18A3	protein_coding	7.07625e-14	0.373747
ENSG00000149021	21.399	-2.0871	0.32527	-6.41652	1.39429e-10	1.83293e-09	SCGB1A1	protein_coding	0.372709	-0.0461618
ENSG00000188508	20.1345	-2.66021	0.310567	-8.56566	1.07461e-17	3.61355e-16	KRTDAP	protein_coding	0.495703	-0.0352872
ENSG00000265179	19.4985	2.19625	0.21494	10.218	1.64784e-24	1.01373e-22	RP11-672L10.2	processed_transcript	1.2597e-28	0.530661
ENSG00000167916	18.7823	-2.26541	0.362856	-6.24329	4.28474e-10	5.2034e-09	KRT24	protein_coding	0.0105067	0.131992
ENSG00000125820	18.3979	2.16195	0.310804	6.95599	3.50103e-12	5.85325e-11	NKX2-2	protein_coding	0.370194	0.0464049
ENSG00000068985	17.8105	-2.85604	0.306539	-9.31708	1.19591e-20	5.26608e-19	PAGE1	protein_coding	0.0483407	-0.10203
ENSG00000234638	16.4451	2.17395	0.289992	7.49658	6.5503e-14	1.39534e-12	AC053503.6	antisense	2.54758e-19	0.441487
ENSG00000258247	16.2247	2.85578	0.36883	7.7428	9.7249e-15	2.30167e-13	RP11-167N24.6	protein_coding	2.58949e-19	0.441408
ENSG00000176194	16.0088	2.19025	0.290062	7.55096	4.32045e-14	9.43012e-13	CIDEA	protein_coding	1.23746e-06	0.247353
ENSG00000179300	15.4666	2.41352	0.19308	12.5001	7.4568e-36	1.14823e-33	ZCCHC5	protein_coding	2.9638e-42	0.626359
ENSG00000168928	15.2108	-2.75668	0.278605	-9.89457	4.39495e-23	2.37407e-21	CTRB2	protein_coding	0.438716	0.0401057
ENSG00000212901	14.4114	-2.11358	0.419889	-5.03367	4.81189e-07	3.52325e-06	KRTAP3-1	protein_coding	0.0245938	-0.116067
ENSG00000170516	13.7975	-2.45515	0.420502	-5.83862	5.26359e-09	5.35014e-08	COX7B2	protein_coding	0.192472	-0.0674507
ENSG00000224957	13.7102	2.06002	0.161197	12.7795	2.13392e-37	3.6574e-35	AC090044.1	lincRNA	1.09211e-56	0.700864
ENSG00000189367	12.9369	2.22657	0.224982	9.89665	4.30443e-23	2.32767e-21	KIAA0408	protein_coding	4.78401e-34	0.572569
ENSG00000272372	12.9	2.08085	0.219947	9.46068	3.05949e-21	1.39969e-19	RP11-441F2.5	antisense	7.61336e-28	0.524104
ENSG00000168925	12.4811	-2.97175	0.325477	-9.13045	6.82171e-20	2.8149e-18	CTRB1	protein_coding	0.249913	0.0595608
ENSG00000217236	11.3937	-2.92772	0.423014	-6.92108	4.48217e-12	7.37878e-11	SP9	protein_coding	0.042593	-0.10477
ENSG00000136694	11.3069	-3.28136	0.43336	-7.5719	3.67811e-14	8.10517e-13	IL36A	protein_coding	0.578116	-0.0288091
ENSG00000242611	11.0365	2.18272	0.20464	10.6661	1.46617e-26	1.08422e-24	AC093627.8	lincRNA	3.7228e-26	0.509421
ENSG00000206072	10.9979	-3.1344	0.43103	-7.27189	3.54486e-13	6.78955e-12	SERPINB11	polymorphic_pseudogene	0.00177606	-0.160876
ENSG00000196666	8.26488	2.14829	0.206577	10.3995	2.49303e-25	1.64596e-23	FAM180B	protein_coding	1.46442e-15	0.396401
ENSG00000178690	7.86161	-2.5244	0.403103	-6.26242	3.79045e-10	4.6377e-09	DYNAP	protein_coding	0.0918558	-0.0871738
ENSG00000198092	7.8597	-2.02068	0.391251	-5.16467	2.40869e-07	1.86018e-06	TMPRSS11F	protein_coding	0.556246	-0.0304809
ENSG00000223774	7.27045	2.33214	0.240761	9.68652	3.44038e-22	1.71703e-20	RP11-307B6.3	antisense	9.21294e-24	0.487317
ENSG00000174325	7.21946	2.44573	0.214775	11.3874	4.83291e-30	4.69415e-28	DIRC1	protein_coding	9.94313e-32	0.555369
ENSG00000099715	7.16272	2.24939	0.243045	9.25502	2.14181e-20	9.24583e-19	PCDH11Y	protein_coding	1.98651e-09	0.30346
ENSG00000231246	6.94054	2.59558	0.176563	14.7006	6.39243e-49	2.90867e-46	RP5-965F6.2	lincRNA	7.42305e-51	0.673305
ENSG00000169059	6.93962	-2.50033	0.442016	-5.65665	1.54353e-08	1.45068e-07	VCX3A	protein_coding	0.0533967	-0.0998364
ENSG00000180772	6.05329	2.38736	0.357385	6.68008	2.38806e-11	3.52363e-10	AGTR2	protein_coding	2.9477e-09	0.300354
ENSG00000196805	5.52117	-4.58733	0.757645	-6.05472	1.40662e-09	1.56244e-08	SPRR2B	protein_coding	0.142984	-0.0757846
ENSG00000164129	5.41998	2.02875	0.226575	8.95401	3.42796e-19	1.32977e-17	NPY5R	protein_coding	5.323e-17	0.414475
ENSG00000238269	5.12813	-2.04758	0.364944	-5.61067	2.0155e-08	1.85761e-07	PAGE2B	protein_coding	0.178006	-0.0697027
ENSG00000254959	5.07403	2.61343	0.213254	12.255	1.57928e-34	2.21569e-32	INMT-FAM188B	protein_coding	2.14592e-36	0.589021
ENSG00000229035	4.93658	-3.00762	0.660921	-4.55065	5.34794e-06	3.19391e-05	SPRR2C	pseudogene	0.0117105	-0.130052
ENSG00000258331	4.80429	2.86908	0.312083	9.19331	3.8092e-20	1.60594e-18	RP11-118A3.1	lincRNA	5.47427e-25	0.49884
ENSG00000263520	3.08982	-2.07371	0.467146	-4.4391	9.0334e-06	5.15478e-05	CTD-2535L24.3	lincRNA	0.970691	-0.00190369
ENSG00000185966	2.85727	-2.17267	0.551387	-3.94036	8.13586e-05	0.000378099	LCE3E	protein_coding	0.706584	-0.0195029
ENSG00000260062	2.75936	2.05212	0.333426	6.15463	7.5254e-10	8.78811e-09	RP11-299H22.5	pseudogene	0.0160103	0.124316
ENSG00000239268	2.75622	2.03551	0.291737	6.9772	3.01114e-12	5.083e-11	RP11-384F7.2	lincRNA	1.18734e-17	0.422309
ENSG00000223039	2.55231	2.13558	0.240437	8.88207	6.56277e-19	2.49035e-17	RN7SKP268	misc_RNA	6.09197e-23	0.479356
ENSG00000224414	2.54193	2.08173	0.239339	8.69783	3.383e-18	1.19236e-16	AC010886.2	pseudogene	6.51909e-14	0.374245
ENSG00000267662	2.52689	2.02909	0.228135	8.89427	5.88058e-19	2.23821e-17	AC007796.1	antisense	5.94812e-23	0.479458
ENSG00000226423	2.51339	2.22451	0.279072	7.97109	1.57276e-15	4.10306e-14	AC093642.4	lincRNA	1.58102e-09	0.305241
ENSG00000261296	2.5047	2.08757	0.3625	5.75882	8.47044e-09	8.30228e-08	RP11-299H22.6	lincRNA	0.72614	0.0181467
ENSG00000234262	2.4652	-2.47794	0.57157	-4.33532	1.45546e-05	7.9523e-05	RP1-20N18.4	pseudogene	0.436342	-0.0403139
ENSG00000254041	2.03461	2.41412	0.268707	8.98422	2.60575e-19	1.02659e-17	RP11-574O7.1	antisense	2.00074e-22	0.474235
ENSG00000250084	1.99679	-3.29055	0.67287	-4.89032	1.0067e-06	6.9423e-06	RP11-485B17.5	pseudogene	0.0745063	-0.0922106
ENSG00000229854	1.98845	2.06928	0.272018	7.60713	2.8024e-14	6.27954e-13	RP11-524G24.2	antisense	7.29158e-14	0.373565
ENSG00000250957	1.98767	2.31744	0.369438	6.27289	3.54405e-10	4.36052e-09	RP11-248N22.1	lincRNA	1.59405e-12	0.354177
ENSG00000230746	1.94964	2.8614	0.452326	6.32596	2.51657e-10	3.16968e-09	AC006007.1	lincRNA	2.86222e-12	0.350344
ENSG00000248918	1.94153	2.17429	0.262835	8.27247	1.31209e-16	3.90282e-15	CTD-2089N3.3	lincRNA	5.72306e-23	0.479623
ENSG00000250125	1.88164	2.03277	0.427197	4.75838	1.9515e-06	1.27295e-05	RP11-707A18.1	lincRNA	0.33341	0.0500853
ENSG00000251628	1.81497	3.04055	0.506734	6.00028	1.96973e-09	2.13947e-08	RP11-371M22.1	lincRNA	1.9529e-06	0.242837
ENSG00000253576	1.75974	2.07238	0.255978	8.09592	5.68349e-16	1.57119e-14	GS1-5L10.1	antisense	1.01361e-23	0.48692
ENSG00000259446	1.63943	2.6784	0.359164	7.45733	8.82955e-14	1.83823e-12	RP11-489D6.2	antisense	8.27922e-10	0.310222
ENSG00000264345	1.62308	2.07665	0.266994	7.77789	7.37447e-15	1.77363e-13	RP11-958F21.1	lincRNA	5.73927e-17	0.414076
ENSG00000156282	1.62267	-2.02208	0.657136	-3.07711	0.00209017	0.00685551	CLDN17	protein_coding	0.290664	-0.0547077
ENSG00000236521	1.53224	2.33979	0.365503	6.40158	1.5378e-10	2.01008e-09	NPAP1P4	pseudogene	7.26824e-05	0.203405
ENSG00000221112	1.47899	2.25886	0.334902	6.74484	1.53196e-11	2.32706e-10	AP000908.1	miRNA	6.69706e-12	0.344684
ENSG00000232606	1.36393	2.13928	0.274288	7.7994	6.22e-15	1.51254e-13	AC010090.1	lincRNA	4.2533e-20	0.450024
ENSG00000123307	1.32211	2.09631	0.441027	4.75324	2.0018e-06	1.30072e-05	NEUROD4	protein_coding	0.703882	0.0196914
ENSG00000233473	1.3005	2.06943	0.251942	8.21388	2.14151e-16	6.1829e-15	RAD1P2	pseudogene	3.14119e-19	0.440472
ENSG00000171405	1.29655	-2.33101	0.543502	-4.28887	1.79583e-05	9.61845e-05	XAGE5	protein_coding	0.22462	-0.0628558
ENSG00000202344	1.22386	2.09568	0.350612	5.97722	2.26975e-09	2.44223e-08	RN7SKP208	misc_RNA	3.55237e-07	0.25928
ENSG00000253762	1.15724	2.55631	0.519658	4.91922	8.68912e-07	6.06078e-06	RP11-579E24.2	lincRNA	0.00368515	0.149613
ENSG00000229131	1.10791	-2.01313	0.770287	-2.61348	0.00896241	0.0242755	AC016710.1	lincRNA	0.00215721	-0.157947
ENSG00000132446	1.03335	-2.13897	0.508994	-4.20235	2.64152e-05	0.000136808	FTHL17	protein_coding	0.220859	-0.0633679
ENSG00000242317	0.982782	-2.1315	0.574393	-3.71087	0.000206546	0.000873266	RP11-875H7.5	lincRNA	0.418024	-0.0419423
